# Supplementary material for: Electronic structure calculations on lithium battery electrolyte salts
Source: Royal Society of Chemistry journal article supplement (doi:10.1039/b612297c), 2006-11-17

Supplementary material Johansson, P.

Chemical structures of the anions studied (in the same order as in the paper) :

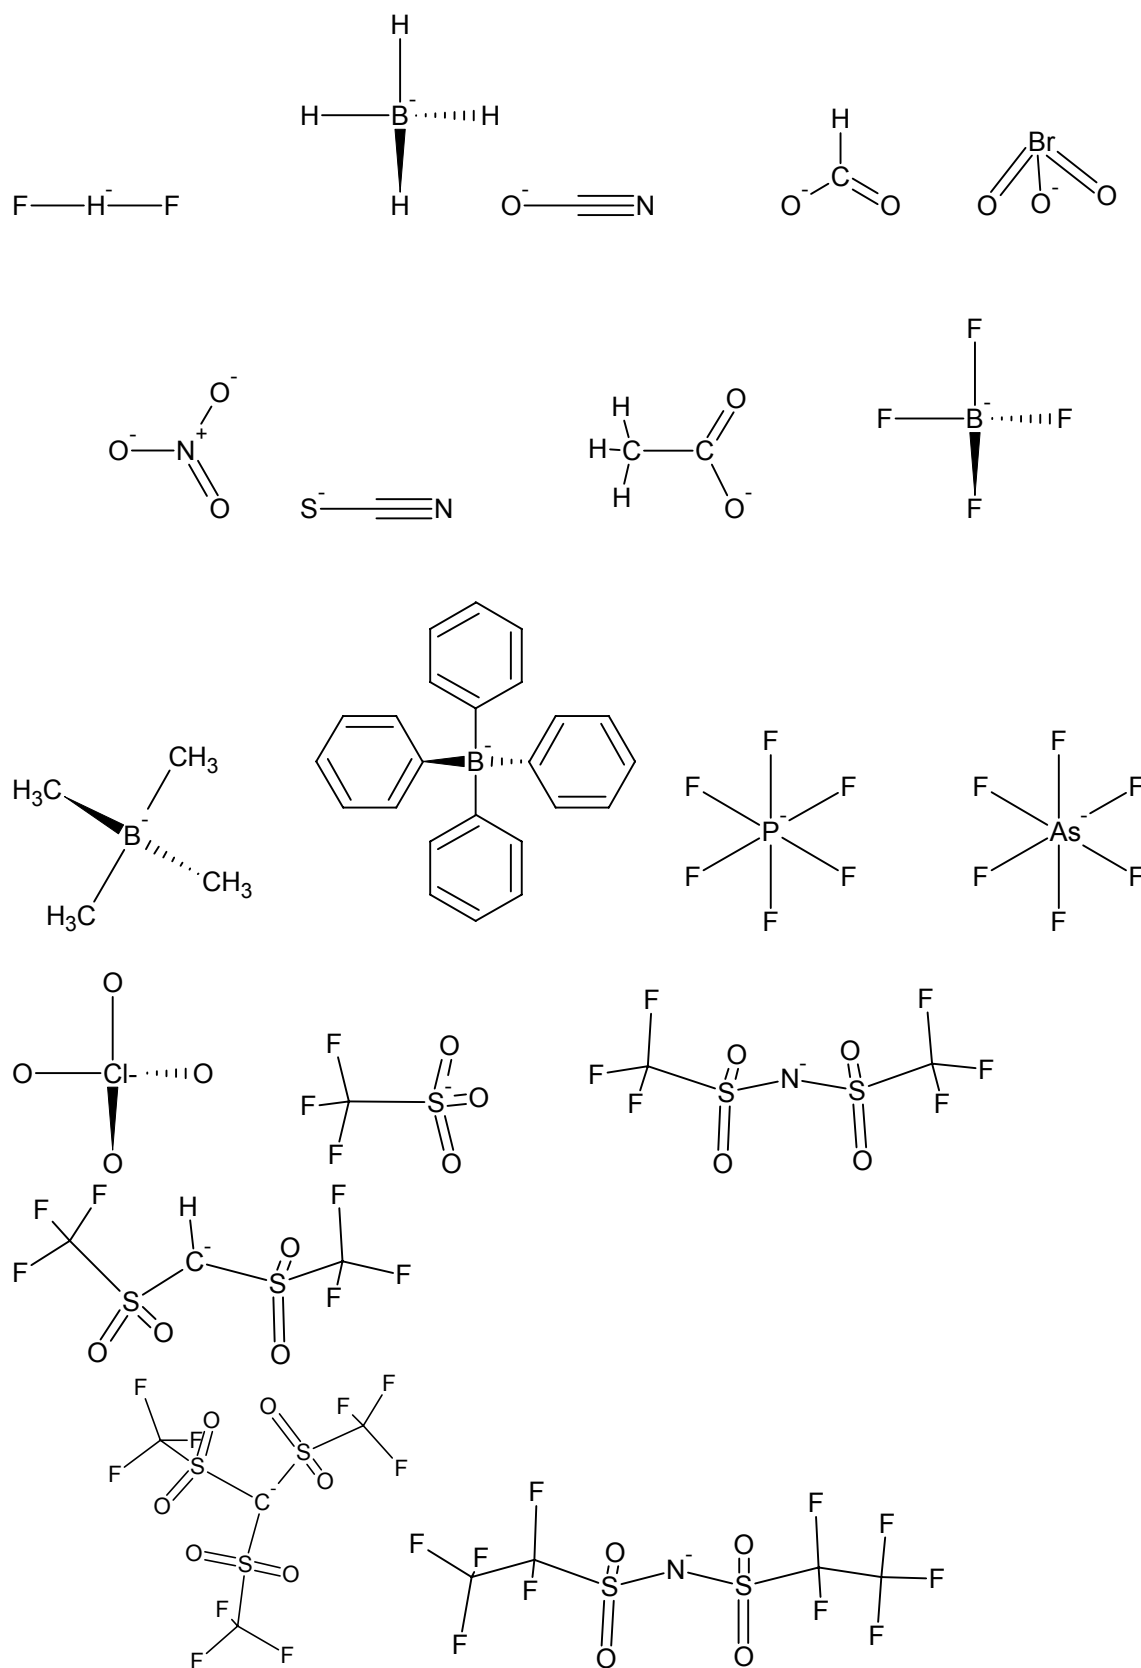

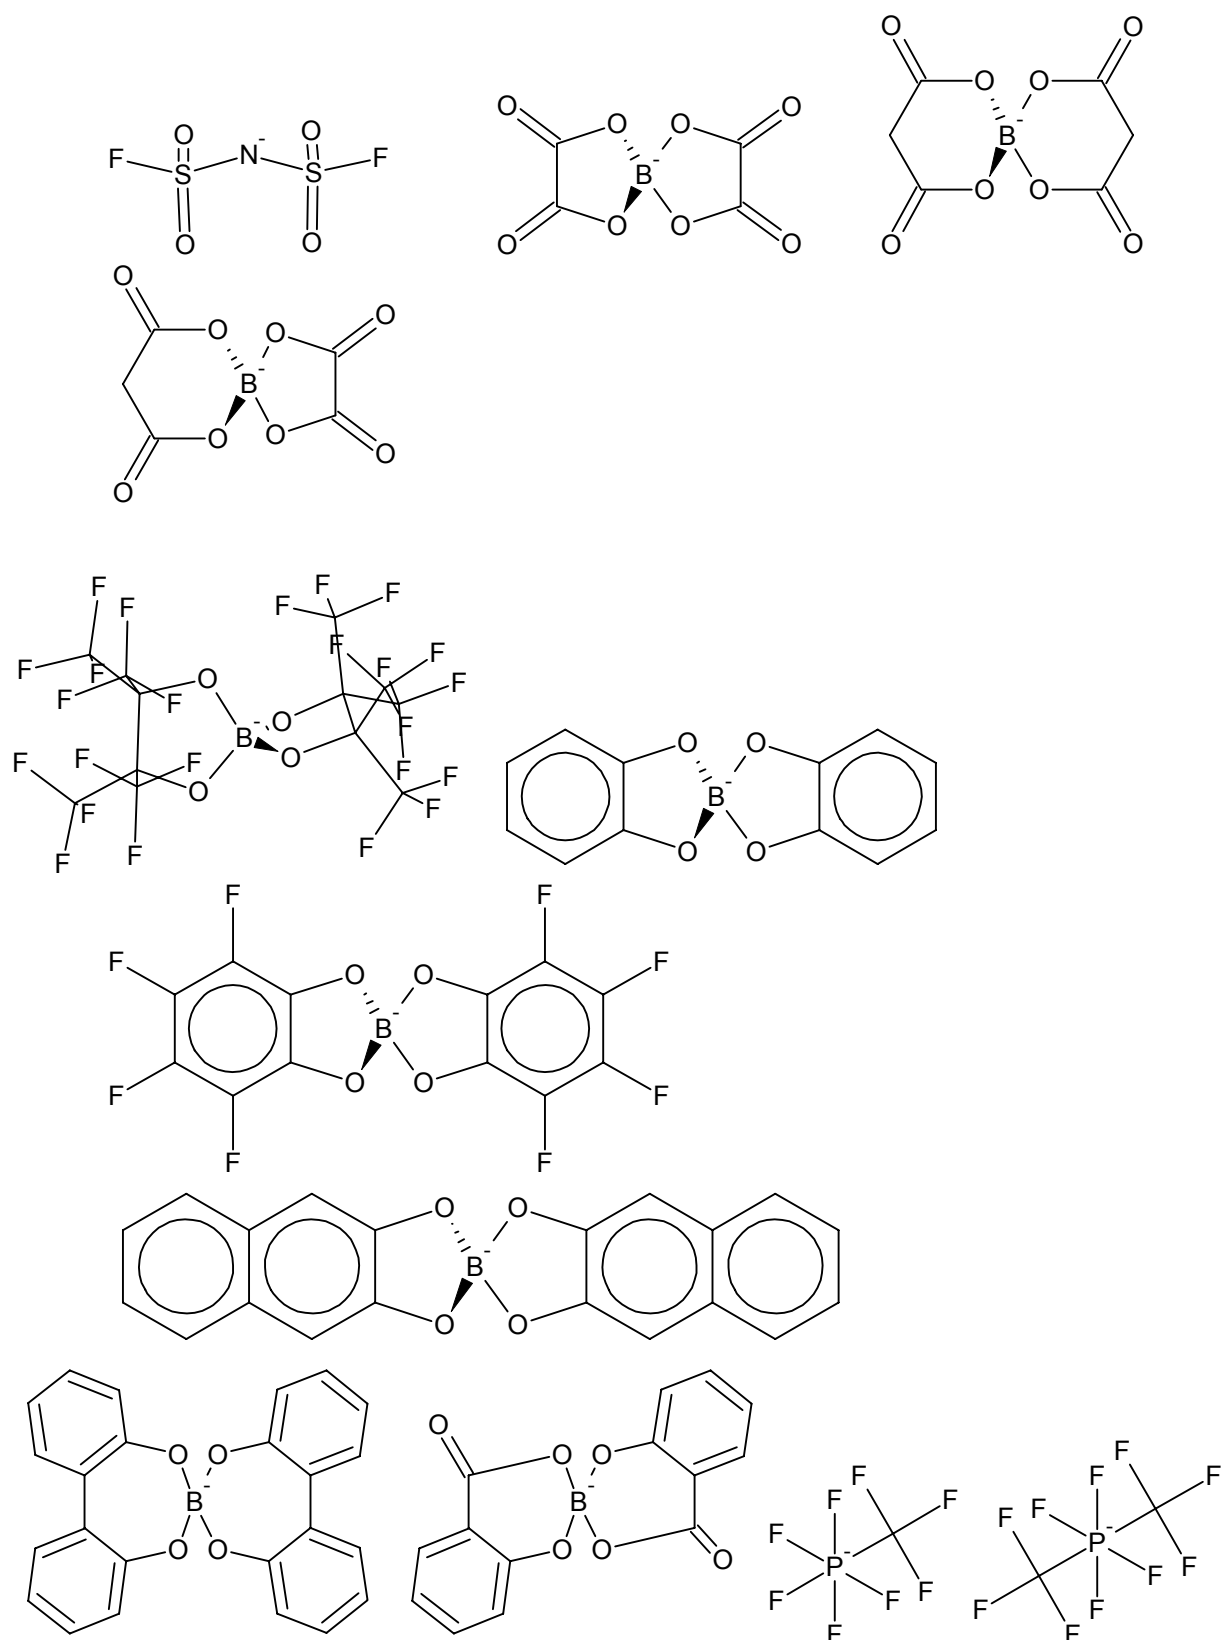

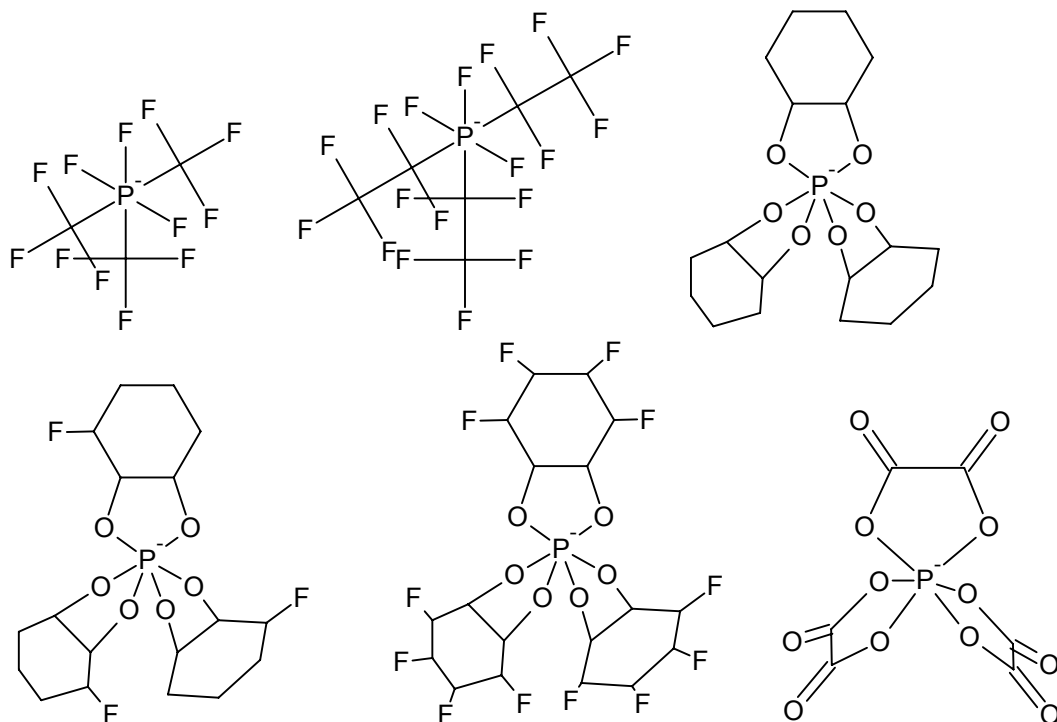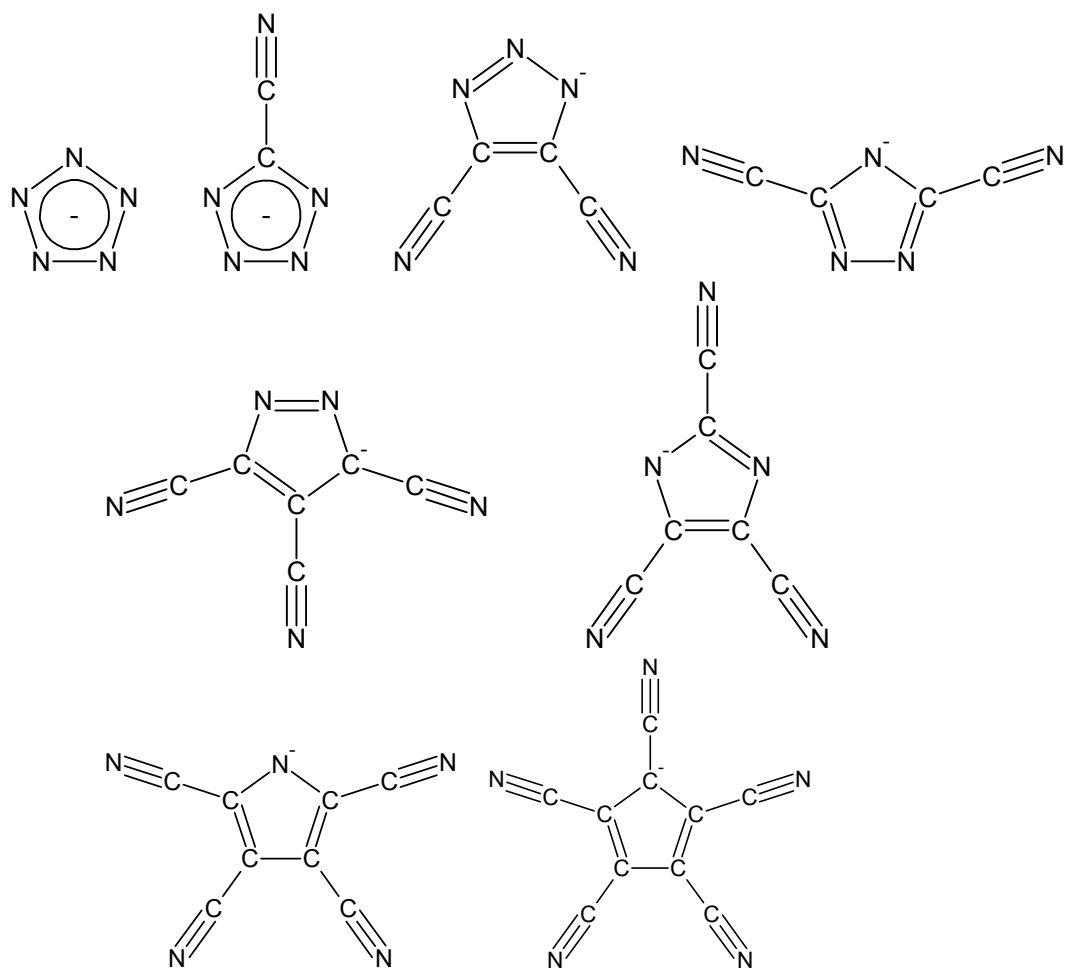

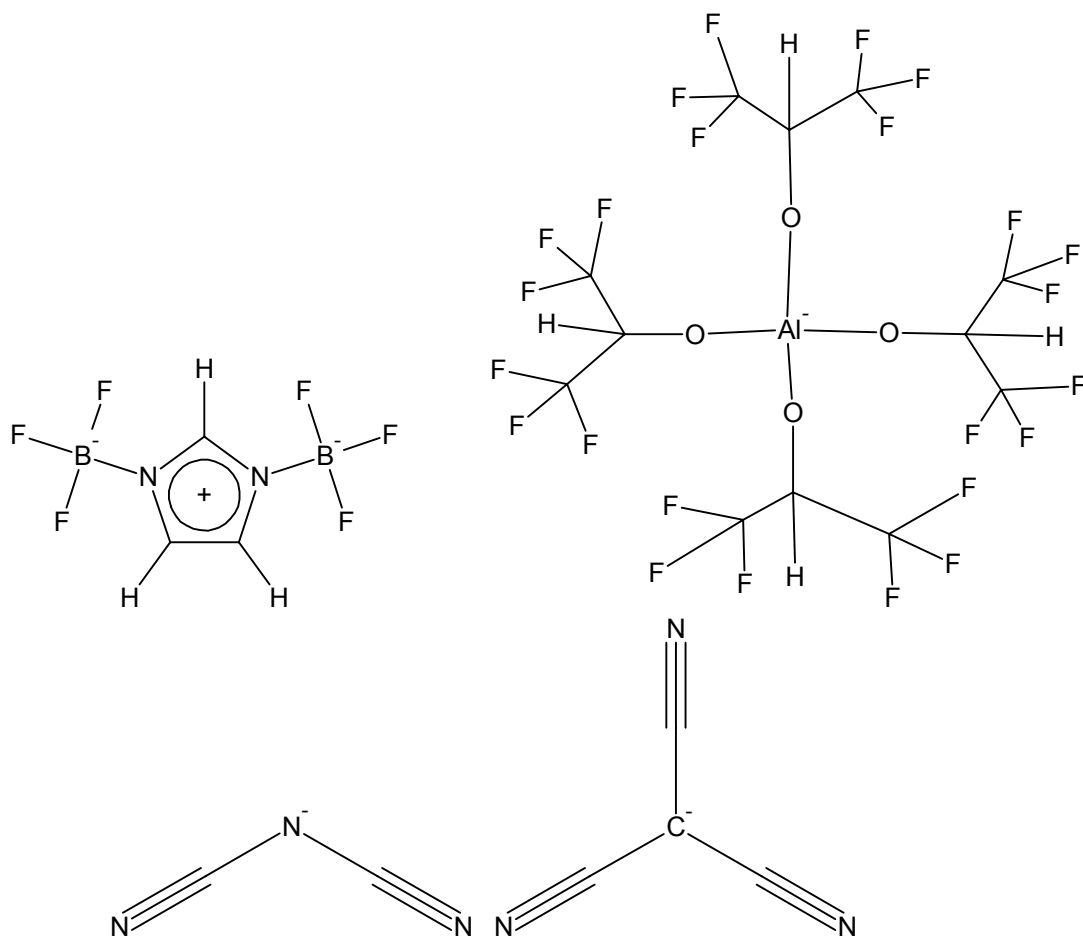

Supplement: b612297c.pdf [file b612297c.pdf]
